# Supplementary material for: DNA melting by RNA polymerase at the T7A1 promoter precedes the rate-limiting step at 37°C and results in the accumulation of an off-pathway intermediate
Source: PubMed Central journal article supplement — Nucleic Acids Res. 2009 Jul 3;37(16):5390–404. doi: 10.1093/nar/gkp560 (PMC2760793; doi:10.1093/nar/gkp560), 2009-07-03

**Supplementary Figure 2.** Footprinting profiles of the T7A1 promoter fragments labeled with fluorophore Alexa 647 at the 5' end of either TS or NTS as a function of incubation time with RNAP.

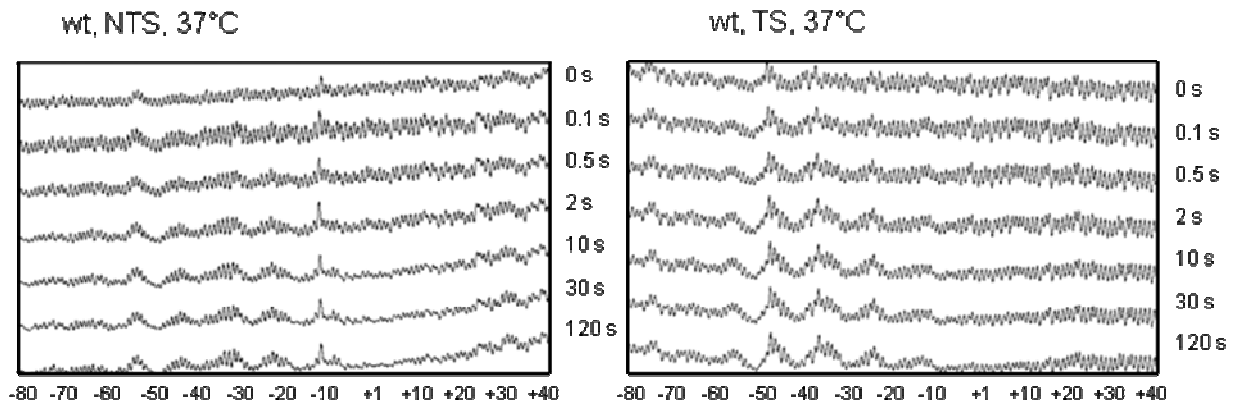

Supplement: gkp560_3.pdf [file gkp560_3.pdf]
