# Supplementary material for: DNA melting by RNA polymerase at the T7A1 promoter precedes the rate-limiting step at 37°C and results in the accumulation of an off-pathway intermediate
Source: PubMed Central journal article supplement — Nucleic Acids Res. 2009 Jul 3;37(16):5390–404. doi: 10.1093/nar/gkp560 (PMC2760793; doi:10.1093/nar/gkp560), 2009-07-03
Supplement: gkp560_4.pdf [file gkp560_4.pdf]

Nontemplate strand

Template strand

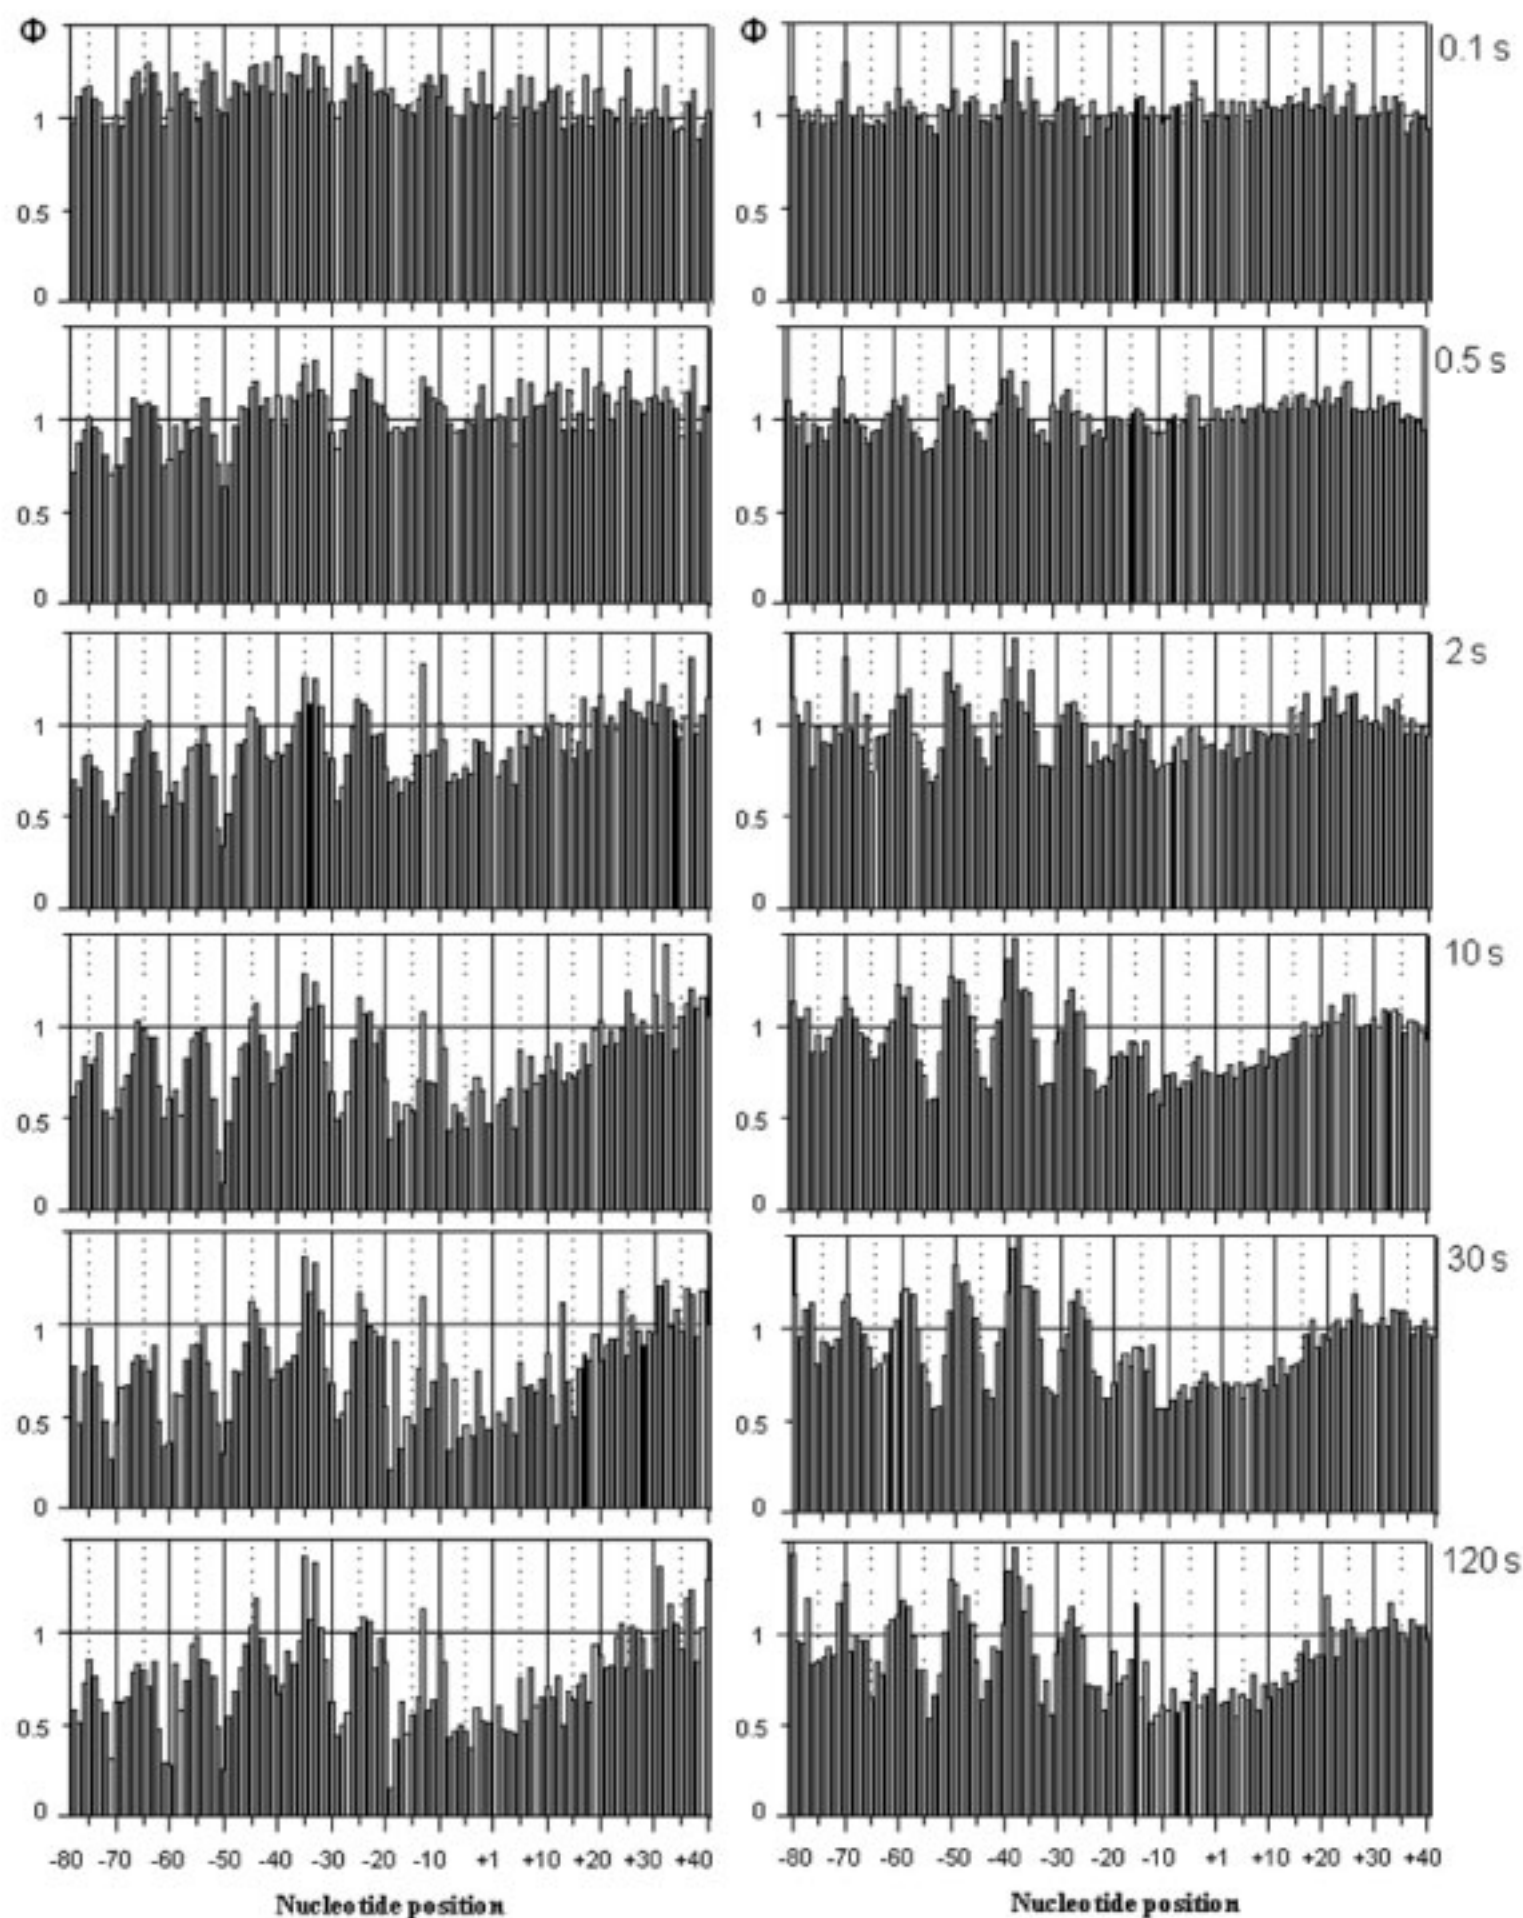

**Supplementary Figure 3.** The bar plots show the ratio of the area of each peak relative to that in the naked DNA (lane at 0 s) for the two strands (non template at the left panel and template at the right panel), in the course of the binding reaction. The bar at nucleotide position 0 is missing because in the conventional numbering of the nucleotides in a promoter 0 is not used. Wild type T7A1 promoter at 37°C.
