# Supplementary material for: DNA melting by RNA polymerase at the T7A1 promoter precedes the rate-limiting step at 37°C and results in the accumulation of an off-pathway intermediate
Source: PubMed Central journal article supplement — Nucleic Acids Res. 2009 Jul 3;37(16):5390–404. doi: 10.1093/nar/gkp560 (PMC2760793; doi:10.1093/nar/gkp560), 2009-07-03
Supplement: gkp560_7.pdf [file gkp560_7.pdf]

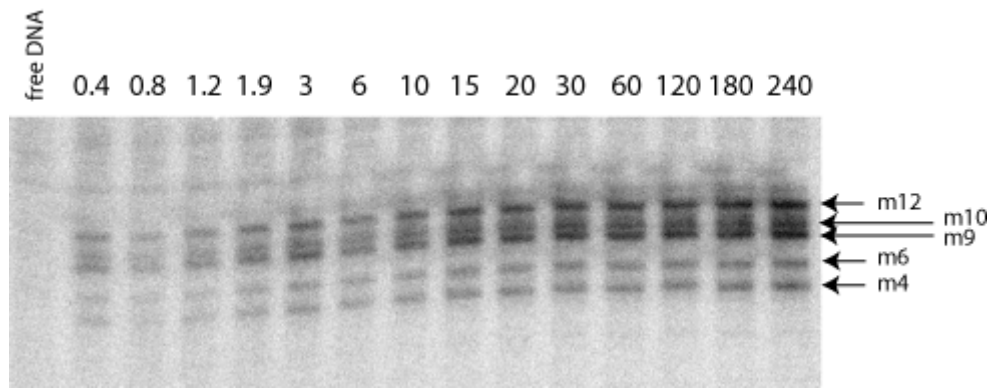

**Supplementary Figure 6. Evolution of time-resolved potassium permanganate reactivity of the thymines on the template strand during formation of the RNAP-promoter complex.** Representative gel of the reactivity pattern obtained upon mixing RNAP with consensus -10 T7A1 promoter for different amounts of mixing time, in seconds, shown above each lane.
