# Supplementary material for: DNA melting by RNA polymerase at the T7A1 promoter precedes the rate-limiting step at 37°C and results in the accumulation of an off-pathway intermediate
Source: PubMed Central journal article supplement — Nucleic Acids Res. 2009 Jul 3;37(16):5390–404. doi: 10.1093/nar/gkp560 (PMC2760793; doi:10.1093/nar/gkp560), 2009-07-03
Supplement: gkp560_8.pdf [file gkp560_8.pdf]

**Supplementary Table 1.** Values for the rate and amplitude of each phase in the kinetics of appearance of fractional saturation for the time-resolved X-ray footprinting experiments.

| <b>Wild type T7A1 promoter, 37°C, Template strand</b> |                                        |                      |                             |          |
|-------------------------------------------------------|----------------------------------------|----------------------|-----------------------------|----------|
| <b>Nucleotide position</b>                            | <b>Apparent rates (s<sup>-1</sup>)</b> |                      | <b>% of total amplitude</b> |          |
|                                                       | <b>k<sub>A</sub></b>                   | <b>k<sub>B</sub></b> | <b>A</b>                    | <b>B</b> |
| m55–m53                                               | 1.15 ± 0.15                            | 0.032 ± 0.006        | 57.1                        | 42.9     |
| m45–m42                                               | 0.98 ± 0.29                            | 0.067 ± 0.018        | 46.5                        | 53.5     |
| m34–m31                                               | 0.99 ± 0.23                            | 0.069 ± 0.014        | 48.6                        | 51.4     |
| m23–m20                                               | 0.82 ± 0.22                            | 0.079 ± 0.014        | 41.4                        | 58.6     |
| m19–m13                                               | 0.31 ± 0.06                            | 0.016 ± 0.006        | 57.2                        | 42.8     |
| m12–m9                                                | 0.67 ± 0.12                            | 0.062 ± 0.010        | 47.5                        | 52.5     |
| m8–m6                                                 | 0.36 ± 0.09                            | 0.049 ± 0.013        | 51.5                        | 48.5     |
| m5–m3                                                 | 0.17 ± 0.03                            | 0.018 ± 0.012        | 74.4                        | 25.6     |
| m2–p2                                                 | 0.34 ± 0.09                            | 0.051 ± 0.011        | 46.1                        | 53.9     |
| p3–p6                                                 | 0.16 ± 0.02                            | 0.015 ± 0.005        | 67.3                        | 32.7     |
| p7–p9                                                 | 0.16 ± 0.06                            | 0.037 ± 0.023        | 57.9                        | 42.1     |
| p10–p13                                               | 0.18 ± 0.03                            | 0.028 ± 0.015        | 71.0                        | 29.0     |
| p14–p20                                               | 0.20 ± 0.06                            | 0.021 ± 0.006        | 45.3                        | 54.7     |

| <b>Wild type T7A1 promoter, 37°C, Non–template strand</b> |                                        |                      |                             |          |
|-----------------------------------------------------------|----------------------------------------|----------------------|-----------------------------|----------|
| <b>Nucleotide position</b>                                | <b>Apparent rates (s<sup>-1</sup>)</b> |                      | <b>% of total amplitude</b> |          |
|                                                           | <b>k<sub>A</sub></b>                   | <b>k<sub>B</sub></b> | <b>A</b>                    | <b>B</b> |
| m73–m70                                                   | 1.86 ± 0.25                            | 0.048 ± 0.020        | 73.5                        | 26.5     |
| m62–m58                                                   | 1.70 ± 0.29                            | 0.046 ± 0.010        | 54.6                        | 45.4     |
| m52–m48                                                   | 1.73 ± 0.24                            | 0.025 ± 0.014        | 74.2                        | 25.8     |
| m41–m38                                                   | 0.86 ± 0.10                            | 0.018 ± 0.013        | 72.7                        | 27.3     |
| m31–m27                                                   | 0.91 ± 0.22                            | 0.150 ± 0.055        | 60.4                        | 39.6     |
| m20–m14                                                   | 0.71 ± 0.07                            | 0.039 ± 0.008        | 61.3                        | 38.7     |
| m12–m11, m9–m5                                            | 0.54 ± 0.06                            | 0.064 ± 0.016        | 66.6                        | 33.4     |
| m4–p2                                                     | 0.33 ± 0.05                            | 0.034 ± 0.012        | 67.0                        | 33.0     |
| p3–p6                                                     | 0.36 ± 0.04                            | 0.026 ± 0.012        | 72.4                        | 27.6     |
| p7–p12                                                    | 0.20 ± 0.03                            | 0.027 ± 0.028        | 80.4                        | 19.6     |
| p15–p20                                                   | 0.32 ± 0.08                            | 0.041 ± 0.015        | 55.5                        | 44.5     |

**Supplementary Table 1A.** Values for the apparent rate constants and the amplitudes of both phases as a function of nucleotide position on the template (top panel) and non–template strand (bottom panel) for the case of *E.coli* RNAP holoenzyme–wild type *T7A1* complex formation at 37°C.

| <b>Mutant T7A1 promoter (consensus -10 region), 37°C, Template strand</b> |                                        |                      |                             |          |
|---------------------------------------------------------------------------|----------------------------------------|----------------------|-----------------------------|----------|
| <b>Nucleotide position</b>                                                | <b>Apparent rates (s<sup>-1</sup>)</b> |                      | <b>% of total amplitude</b> |          |
|                                                                           | <b>k<sub>A</sub></b>                   | <b>k<sub>B</sub></b> | <b>A</b>                    | <b>B</b> |
| m55–m53                                                                   | 2.46 ± 0.62                            | 0.183 ± 0.075        | 60.6                        | 39.4     |
| m45–m42                                                                   | 2.01 ± 0.43                            | 0.260 ± 0.072        | 56.4                        | 43.6     |
| m33–m31                                                                   | 2.02 ± 0.78                            | 0.301 ± 0.099        | 45.9                        | 54.1     |
| m23–m20                                                                   | 1.68 ± 0.53                            | 0.239 ± 0.054        | 43.6                        | 56.4     |
| m18–m14                                                                   | 1.32 ± 0.71                            | 0.239 ± 0.094        | 43.6                        | 56.4     |
| m13–m10                                                                   | 1.07 ± 0.23                            | 0.151 ± 0.042        | 56.9                        | 43.1     |
| m9–m6                                                                     | 1.18 ± 0.32                            | 0.196 ± 0.043        | 46.7                        | 53.3     |
| m5–m3                                                                     | 0.99 ± 0.19                            | 0.138 ± 0.030        | 52.5                        | 47.5     |
| m2–p1                                                                     | 1.06 ± 0.26                            | 0.165 ± 0.035        | 47.5                        | 52.5     |
| p2–p4                                                                     | 0.94 ± 0.35                            | 0.179 ± 0.040        | 39.4                        | 60.6     |
| p5–p9                                                                     | 0.92 ± 0.19                            | 0.163 ± 0.028        | 47.2                        | 52.8     |
| p10–p13                                                                   | 0.65 ± 0.16                            | 0.166 ± 0.037        | 48.2                        | 51.8     |
| p14–p20                                                                   | 0.69 ± 0.24                            | 0.187 ± 0.069        | 51.7                        | 48.3     |

| <b>Mutant T7A1 promoter (consensus -10 region), 37°C, Non–template strand</b> |                                        |                      |                             |          |
|-------------------------------------------------------------------------------|----------------------------------------|----------------------|-----------------------------|----------|
| <b>Nucleotide position</b>                                                    | <b>Apparent rates (s<sup>-1</sup>)</b> |                      | <b>% of total amplitude</b> |          |
|                                                                               | <b>k<sub>A</sub></b>                   | <b>k<sub>B</sub></b> | <b>A</b>                    | <b>B</b> |
| m72–m68                                                                       | 2.07 ± 0.29                            | 0.107 ± 0.038        | 74.0                        | 26.0     |
| m63–m58                                                                       | 1.94 ± 0.55                            | 0.109 ± 0.023        | 45.8                        | 54.2     |
| m53–m48                                                                       | 1.41 ± 0.39                            | 0.104 ± 0.013        | 34.1                        | 65.9     |
| m42–m38                                                                       | 1.13 ± 0.38                            | 0.099 ± 0.013        | 30.9                        | 69.1     |
| m31–m26                                                                       | 0.78 ± 0.24                            | 0.085 ± 0.010        | 28.5                        | 71.5     |
| m20–m17                                                                       | 0.72 ± 0.14                            | 0.062 ± 0.006        | 35.2                        | 64.8     |
| m16–m15                                                                       | 0.90 ± 0.33                            | 0.097 ± 0.017        | 34.1                        | 65.9     |
| m14–m13                                                                       | 0.64 ± 0.31                            | 0.078 ± 0.017        | 31.7                        | 68.3     |
| m12–m11                                                                       | 0.71 ± 0.19                            | 0.070 ± 0.009        | 34.4                        | 65.6     |
| m9–m4                                                                         | 0.63 ± 0.13                            | 0.073 ± 0.007        | 33.2                        | 66.8     |
| m3–p2                                                                         | 0.44 ± 0.08                            | 0.059 ± 0.006        | 37.5                        | 62.5     |
| p3–p7                                                                         | 0.44 ± 0.09                            | 0.058 ± 0.007        | 39.4                        | 60.6     |
| p8–p13                                                                        | 0.42 ± 0.11                            | 0.065 ± 0.009        | 34.8                        | 65.2     |
| p14–p20                                                                       | 0.19 ± 0.04                            | 0.032 ± 0.007        | 49.0                        | 51.0     |

**Supplementary Table 1B.** Values for the apparent rate constants and the amplitudes of both phases as a function of nucleotide position on template (top panel) and non–template strand (bottom panel) for the case of *E.coli* RNAP holoenzyme binding to the *T7A1* promoter mutant with the consensus -10 sequence at 37°C.

| Wild type T7A1 promoter, 20°C, Template strand |                                   |                |                      |      |
|------------------------------------------------|-----------------------------------|----------------|----------------------|------|
| Nucleotide position                            | Apparent rates (s <sup>-1</sup> ) |                | % of total amplitude |      |
|                                                | k <sub>A</sub>                    | k <sub>B</sub> | A                    | B    |
| m46–m42                                        | 0.88 ± 0.12                       | 0.050 ± 0.024  | 77.7                 | 22.3 |
| m34–m29                                        | 1.06 ± 0.18                       | 0.106 ± 0.036  | 65.0                 | 35.0 |
| m23–m19                                        | 0.96 ± 0.11                       | 0.076 ± 0.014  | 62.1                 | 37.9 |
| m18–m16                                        | 0.70 ± 0.18                       | 0.046 ± 0.015  | 53.7                 | 46.3 |
| m15–m8                                         | 0.86 ± 0.09                       | 0.089 ± 0.013  | 56.1                 | 43.9 |
| m7–m6                                          | 0.81 ± 0.19                       | 0.041 ± 0.007  | 41.0                 | 59.0 |
| m5–m3                                          | 0.66 ± 0.18                       | 0.046 ± 0.006  | 33.3                 | 66.7 |
| m2–p3                                          | 1.18 ± 0.30                       | 0.078 ± 0.010  | 36.7                 | 63.3 |
| p4–p9                                          | 0.59 ± 0.11                       | 0.032 ± 0.003  | 31.2                 | 68.8 |
| p10–p17                                        | 0.72 ± 0.17                       | 0.029 ± 0.003  | 31.0                 | 69.0 |

| Wild type T7A1 promoter, 20°C, Non–template strand |                                   |                |                      |      |
|----------------------------------------------------|-----------------------------------|----------------|----------------------|------|
| Nucleotide position                                | Apparent rates (s <sup>-1</sup> ) |                | % of total amplitude |      |
|                                                    | k <sub>A</sub>                    | k <sub>B</sub> | A                    | B    |
| m72–m70                                            | 2.52 ± 0.39                       | 0.142 ± 0.100  | 81.9                 | 18.1 |
| m63–m57                                            | 2.36 ± 0.31                       | 0.137 ± 0.033  | 65.8                 | 34.2 |
| m53,m52,m48                                        | 1.38 ± 0.23                       | 0.072 ± 0.030  | 71.4                 | 28.6 |
| m51–m49                                            | 1.75 ± 0.22                       | 0.130 ± 0.038  | 71.3                 | 28.7 |
| m43,m42,m38                                        | 1.13 ± 0.30                       | 0.160 ± 0.104  | 70.8                 | 29.2 |
| m41–m39                                            | 1.07 ± 0.14                       | 0.080 ± 0.033  | 72.6                 | 27.4 |
| m32–m30,m26                                        | 0.84 ± 0.14                       | 0.084 ± 0.027  | 65.3                 | 34.7 |
| m29–m27                                            | 0.85 ± 0.12                       | 0.084 ± 0.030  | 70.7                 | 29.3 |
| m20–m18                                            | 0.84 ± 0.17                       | 0.102 ± 0.040  | 64.5                 | 35.5 |
| m17–m14                                            | 0.75 ± 0.11                       | 0.087 ± 0.021  | 61.6                 | 38.4 |
| m9–m7                                              | 0.76 ± 0.24                       | 0.127 ± 0.057  | 58.2                 | 41.8 |
| m6–m3                                              | 0.68 ± 0.16                       | 0.058 ± 0.011  | 42.1                 | 57.9 |
| m2–p2                                              | 0.39 ± 0.13                       | 0.047 ± 0.008  | 32.3                 | 67.7 |
| p3–p6                                              | 0.41 ± 0.11                       | 0.049 ± 0.008  | 36.0                 | 64.0 |
| p7–p12                                             |                                   | 0.048 ± 0.002  |                      |      |
| p13–p20                                            |                                   | 0.056 ± 0.003  |                      |      |

**Supplementary Table 1C.** Values for the apparent rate constants and the amplitudes of both phases as a function of nucleotide position on template (top panel) and non–template strand (bottom panel) for the case of *E.coli* RNAP holoenzyme–wild type *T7A1* complex formation at 20°C.
