# Supplementary material for: DNA melting by RNA polymerase at the T7A1 promoter precedes the rate-limiting step at 37°C and results in the accumulation of an off-pathway intermediate
Source: PubMed Central journal article supplement — Nucleic Acids Res. 2009 Jul 3;37(16):5390–404. doi: 10.1093/nar/gkp560 (PMC2760793; doi:10.1093/nar/gkp560), 2009-07-03
Supplement: gkp560_9.pdf [file gkp560_9.pdf]

**Supplementary Table 2. F test results.** *F* values for the data sets that were fit to the double exponential equation. The *F* test comparison of fits was performed to determine whether the greater number of variables in the double exponential equation was responsible for the better fit compared with the single exponential equation (for details see section “Data analysis”). The *F* values corresponding to the 95 % and 99 % confidence levels are shown. If the *F* value for a given data set is greater than its 95 % confidence level, for example, it means that there is at most a 5% probability that the scatter in the data could result in a better fit to the simpler model (a single exponential); therefore, we can say with a 95 % confidence level that a double exponential results in a better fit of the data. This analysis was performed by using the software PRISM (GraphPad, San Diego).

| <b>Wild type T7A1 promoter, 37°C, Template strand</b> |            |            |                       |                                        |                                        |
|-------------------------------------------------------|------------|------------|-----------------------|----------------------------------------|----------------------------------------|
| <b>Tymine position</b>                                | <b>DFn</b> | <b>DFd</b> | <b><i>F</i> value</b> | <b><i>F</i> value for P=0.05 (95%)</b> | <b><i>F</i> value for P=0.01 (99%)</b> |
| m12                                                   | 2          | 63         | 21.029                | 3.143                                  | 4.959                                  |
| m10                                                   | 2          | 63         | 28.168                | 3.143                                  | 4.959                                  |
| m6                                                    | 2          | 63         | 33.012                | 3.143                                  | 4.959                                  |
| m4                                                    | 2          | 62         | 45.060                | 3.145                                  | 4.965                                  |
| p1                                                    | 2          | 60         | 49.261                | 3.150                                  | 4.977                                  |

**Table 2A.** *F* test results for the fits to the time-resolved permanganate data on the template strand of the wild type T7A1 promoter at 37°C.

| <b>Mutant T7A1 promoter (consensus -10 region), 37°C, Template strand</b> |            |            |                       |                                        |                                        |
|---------------------------------------------------------------------------|------------|------------|-----------------------|----------------------------------------|----------------------------------------|
| <b>Tymine position</b>                                                    | <b>DFn</b> | <b>DFd</b> | <b><i>F</i> value</b> | <b><i>F</i> value for P=0.05 (95%)</b> | <b><i>F</i> value for P=0.01 (99%)</b> |
| m12                                                                       | 2          | 27         | 16.244                | 3.354                                  | 5.488                                  |
| m4                                                                        | 2          | 27         | 15.411                | 3.354                                  | 5.488                                  |

**Table 2B.** *F* test results for the fits to the time-resolved permanganate data on the template strand of the consensus-10 T7A1 mutant promoter at 37°C.

| Wild type T7A1 promoter, 37°C, Template strand |     |     |         |                          |                          |
|------------------------------------------------|-----|-----|---------|--------------------------|--------------------------|
| Nucleotide position                            | DFn | DFd | F value | F value for P=0.05 (95%) | F value for P=0.01 (99%) |
| m55-m53                                        | 2   | 74  | 75.893  | 3.120                    | 4.904                    |
| m45-m42                                        | 2   | 68  | 19.259  | 3.132                    | 4.932                    |
| m34-m31                                        | 2   | 99  | 34.043  | 3.088                    | 4.826                    |
| m23-m20                                        | 2   | 97  | 22.707  | 3.090                    | 4.831                    |
| m19-m13                                        | 2   | 146 | 23.097  | 3.058                    | 4.754                    |
| m12-m9                                         | 2   | 98  | 42.788  | 3.089                    | 4.829                    |
| m8-m6                                          | 2   | 83  | 17.634  | 3.107                    | 4.870                    |
| m5-m3                                          | 2   | 80  | 5.687   | 3.111                    | 4.881                    |
| m2-p2                                          | 2   | 103 | 18.434  | 3.085                    | 4.817                    |
| p3-p6                                          | 2   | 118 | 27.051  | 3.073                    | 4.790                    |
| p7-p9                                          | 2   | 76  | 4.490   | 3.117                    | 4.896                    |
| p10-p13                                        | 2   | 107 | 10.109  | 3.081                    | 4.809                    |
| p14-p20                                        | 2   | 94  | 15.370  | 3.093                    | 4.838                    |

| Wild type T7A1 promoter, 37°C, Non-template strand |     |     |         |                          |                          |
|----------------------------------------------------|-----|-----|---------|--------------------------|--------------------------|
| Nucleotide position                                | DFn | DFd | F value | F value for P=0.05 (95%) | F value for P=0.01 (99%) |
| m73-m70                                            | 2   | 64  | 17.884  | 3.140                    | 4.953                    |
| m62-m58                                            | 2   | 70  | 60.452  | 3.128                    | 4.922                    |
| m52-m48                                            | 2   | 88  | 15.403  | 3.100                    | 4.855                    |
| m41-m38                                            | 2   | 64  | 14.317  | 3.140                    | 4.953                    |
| m31-m27                                            | 2   | 73  | 12.761  | 3.122                    | 4.908                    |
| m20-m14                                            | 2   | 137 | 64.407  | 3.062                    | 4.763                    |
| m12-m11, m9-m5                                     | 2   | 154 | 32.927  | 3.055                    | 4.746                    |
| m4-p2                                              | 2   | 121 | 22.419  | 3.071                    | 4.785                    |
| p3-p6                                              | 2   | 89  | 21.235  | 3.099                    | 4.852                    |
| p7-p12                                             | 2   | 126 | 4.824   | 3.068                    | 4.778                    |
| p15-p20                                            | 2   | 99  | 13.600  | 3.088                    | 4.826                    |

**Table 2C.** F Test results for the fits to the time-resolved X-ray footprinting data of the wild type T7A1 promoter at 37°C.

| <b>Mutant T7A1 promoter (consensus -10 region), 37°C, Template strand</b> |            |            |                |                                 |                                 |
|---------------------------------------------------------------------------|------------|------------|----------------|---------------------------------|---------------------------------|
| <b>Nucleotide position</b>                                                | <b>DFn</b> | <b>DFd</b> | <b>F value</b> | <b>F value for P=0.05 (95%)</b> | <b>F value for P=0.01 (99%)</b> |
| m55-m53                                                                   | 2          | 54         | 12.555         | 3.186                           | 5.021                           |
| m45-m42                                                                   | 2          | 74         | 17.846         | 3.120                           | 4.904                           |
| m33-m31                                                                   | 2          | 59         | 7.353          | 3.153                           | 4.984                           |
| m23-m20                                                                   | 2          | 76         | 15.305         | 3.117                           | 4.896                           |
| m18-m14                                                                   | 2          | 84         | 4.665          | 3.105                           | 4.867                           |
| m13-m10                                                                   | 2          | 93         | 20.368         | 3.094                           | 4.841                           |
| m9-m6                                                                     | 2          | 95         | 19.986         | 3.092                           | 4.836                           |
| m5-m3                                                                     | 2          | 71         | 31.351         | 3.126                           | 4.917                           |
| m2-p1                                                                     | 2          | 73         | 24.333         | 3.122                           | 4.908                           |
| p2-p4                                                                     | 2          | 82         | 13.959         | 3.108                           | 4.874                           |
| p5-p9                                                                     | 2          | 144        | 34.030         | 3.059                           | 4.756                           |
| p10-p13                                                                   | 2          | 116        | 18.635         | 3.074                           | 4.793                           |
| p14-p20                                                                   | 2          | 175        | 8.188          | 3.048                           | 4.729                           |

| <b>Mutant T7A1 promoter (consensus -10 region), 37°C, Non-template strand</b> |            |            |                |                                 |                                 |
|-------------------------------------------------------------------------------|------------|------------|----------------|---------------------------------|---------------------------------|
| <b>Nucleotide position</b>                                                    | <b>DFn</b> | <b>DFd</b> | <b>F value</b> | <b>F value for P=0.05 (95%)</b> | <b>F value for P=0.01 (99%)</b> |
| m72-m68                                                                       | 2          | 51         | 19.976         | 3.179                           | 5.047                           |
| m63-m58                                                                       | 2          | 68         | 29.175         | 3.132                           | 4.932                           |
| m53-m48                                                                       | 2          | 149        | 39.591         | 3.057                           | 4.750                           |
| m42-m38                                                                       | 2          | 137        | 25.188         | 3.062                           | 4.763                           |
| m31-m26                                                                       | 2          | 145        | 24.896         | 3.058                           | 4.755                           |
| m20-m17                                                                       | 2          | 108        | 56.127         | 3.080                           | 4.807                           |
| m16-m15                                                                       | 2          | 53         | 17.047         | 3.172                           | 5.030                           |
| m14-m13                                                                       | 2          | 49         | 8.068          | 3.187                           | 5.066                           |
| m12-m11                                                                       | 2          | 54         | 27.334         | 3.168                           | 5.021                           |
| m9-m4                                                                         | 2          | 157        | 48.806         | 3.054                           | 4.743                           |
| m3-p2                                                                         | 2          | 142        | 46.723         | 3.060                           | 4.758                           |
| p3-p7                                                                         | 2          | 144        | 41.355         | 3.059                           | 4.756                           |
| p8-p13                                                                        | 2          | 127        | 23.687         | 3.068                           | 4.776                           |
| p14-p20                                                                       | 2          | 172        | 29.996         | 3.049                           | 4.731                           |

**Table 2D.** F Test results for the fits to the time-resolved X-ray footprinting data of the consensus-10 T7A1 mutant promoter at 37°C.

| Wild type T7A1 promoter, 20°C, Template strand |     |     |         |                          |                          |
|------------------------------------------------|-----|-----|---------|--------------------------|--------------------------|
| Nucleotide position                            | DFn | DFd | F value | F value for P=0.05 (95%) | F value for P=0.01 (99%) |
| m46-m42                                        | 2   | 160 | 11.132  | 3.053                    | 4.740                    |
| m34-m29                                        | 2   | 77  | 15.907  | 3.115                    | 4.892                    |
| m23-m19                                        | 2   | 159 | 56.896  | 3.053                    | 4.741                    |
| m18-m16                                        | 2   | 101 | 18.817  | 3.086                    | 4.822                    |
| m15-m8                                         | 2   | 219 | 85.754  | 3.037                    | 4.703                    |
| m7-m6                                          | 2   | 76  | 39.588  | 3.117                    | 4.896                    |
| m5-m3                                          | 2   | 130 | 32.854  | 3.066                    | 4.772                    |
| m2-p3                                          | 2   | 163 | 40.505  | 3.051                    | 4.738                    |
| p4-p9                                          | 2   | 253 | 73.947  | 3.073                    | 4.790                    |
| p10-p17                                        | 2   | 228 | 45.596  | 3.035                    | 4.699                    |

| Wild type T7A1 promoter, 20°C, Non-template strand |     |     |         |                          |                          |
|----------------------------------------------------|-----|-----|---------|--------------------------|--------------------------|
| Nucleotide position                                | DFn | DFd | F value | F value for P=0.05 (95%) | F value for P=0.01 (99%) |
| m72-m70                                            | 2   | 50  | 5.626   | 3.183                    | 5.057                    |
| m63-m57                                            | 2   | 98  | 37.377  | 3.089                    | 4.829                    |
| m53,m52,m48                                        | 2   | 70  | 15.116  | 3.128                    | 4.922                    |
| m51-m49                                            | 2   | 70  | 24.653  | 3.128                    | 4.922                    |
| m43,m42,m38                                        | 2   | 59  | 5.186   | 3.153                    | 4.984                    |
| m41-m39                                            | 2   | 63  | 16.808  | 3.143                    | 4.959                    |
| m32-m30,m26                                        | 2   | 81  | 23.493  | 3.109                    | 4.877                    |
| m29-m27                                            | 2   | 68  | 18.414  | 3.132                    | 4.932                    |
| m20-m18                                            | 2   | 68  | 13.554  | 3.132                    | 4.932                    |
| m17-m14                                            | 2   | 95  | 31.069  | 3.092                    | 4.836                    |
| m9-m7                                              | 2   | 69  | 8.069   | 3.130                    | 4.927                    |
| m6-m3                                              | 2   | 98  | 32.205  | 3.089                    | 4.829                    |
| m2-p2                                              | 2   | 105 | 18.951  | 3.083                    | 4.813                    |
| p3-p6                                              | 2   | 98  | 24.810  | 3.089                    | 4.829                    |

**Table 2E.** F Test results for the fits to the time-resolved X-ray footprinting data of the wild type T7A1 promoter at 20°C.
